# Supplementary material for: Crystal vs. melt compositional effects on the partitioning of the first-row transition and high field strength elements between clinopyroxene and silicic, alkaline, aluminous melts
Source: publisher site journal article supplement (doi:10.2138/am-2022-8586), 2022-11-16
Supplement: Supplementary file 1 [file 8586_supp1.pdf › 8586_supp1.pdf]

## Appendix. Supplementary material

He *et al.*, Crystal versus melt compositional effects on the partitioning of the first-row transition and high field strength elements between clinopyroxene and silicic, alkaline, aluminous melts

### Supplementary tables

**Table S1.** Experimental conditions and run products.

**Table S2.** Trace element compositions of starting materials in ppm, as measured by LA-ICP-MS under single-spot (30  $\mu$ m) analytical mode.

**Table S3.** A summary of time-temperature paths for the successful experiments.

**Table S4.** Major element compositions of the SPI standard glass and pyroxene in wt%, as measured by EPMA.

**Table S5.** Major and trace element results for USGS glasses (BIR-1G, BHVO-2G, BCR-2G), MPI-DING glasses (ML3B-G, StHs6/80-G, T1-G), and the Chinese Geological Standard Glass CGSG-1 under different analytical modes by LA-ICP-MS.

**Table S6.** Cpx compositions in terms of molar fractions.

**Table S7.** Trace element (ppm) compositions of glasses, as measured by LA-ICP-MS under single-spot (30  $\mu$ m) analytical mode.

**Table S8.** Selected major (wt% oxides) and trace (ppm) element compositions of cpx, as measured by LA-ICP-MS under different analytical modes.

**Table S9.** Major element (wt%) composition of coexisting cpx (along the A–B transect in Figure 1) and galss (random spot analysis) from run 9H07-2, as measured by EPMA.

**Table S10.** Best fits for lattice strain parameters for individual experiments.

## Supplementary figures and captions

**Fig. S1**

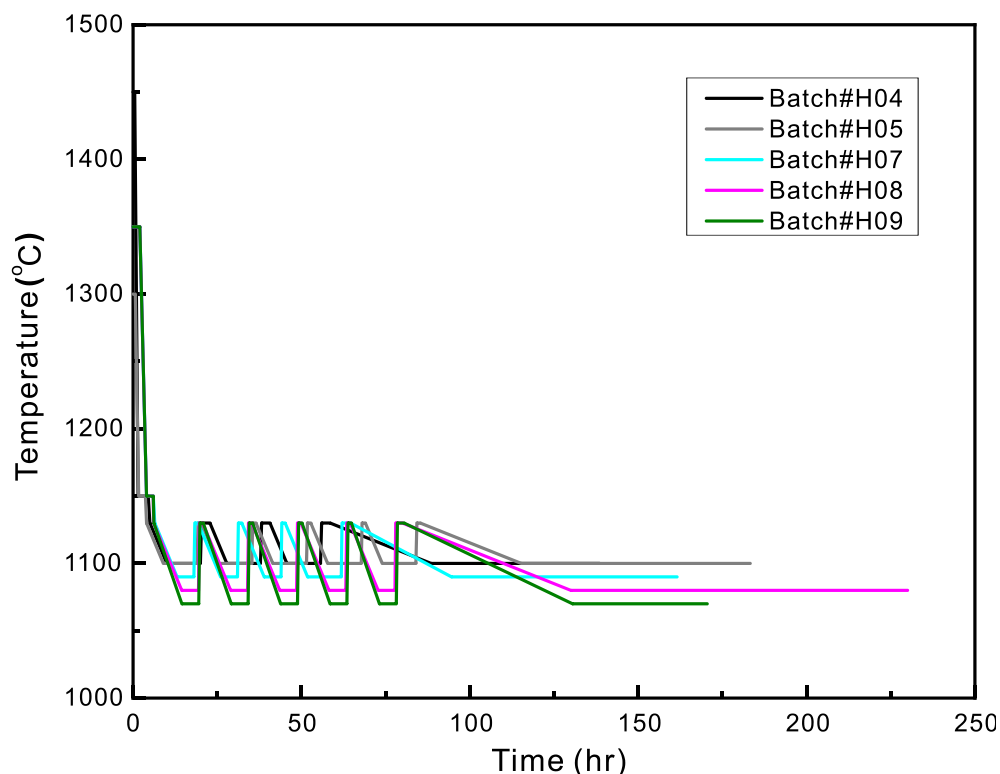

**Fig. S1.** Time-temperature paths for the successful experiments. For Batch#H04, runs were first heated at 1450 °C for 0.5 h, cooled and maintained at 1150 °C for 3 h; runs were then oscillated between 1100 and 1130 °C for 3 rounds with a heating and cooling rate of 90 and 6 °C/h, respectively; and the runs were finally decreased to 1100 °C at rate of 1 °C/h and maintained for 50 h. For Batch#H05, runs were first heated at 1300 °C for 40 min, cooled and maintained at 1150 °C for 2 h; runs were then oscillated between 1100 and 1130 °C for 5 rounds with a heating and cooling rate of 120 and 6 °C/h, respectively; and the runs were finally decreased to 1100 °C at rate of 1 °C/h and maintained for 68 h. For Batch#H07, runs were first heated at 1350 °C for 2 h, cooled and maintained at 1150 °C for 2 h; runs were then oscillated between 1090 and 1130 °C for 4 rounds with a heating and cooling rate of 160 and 6 °C/h, respectively; and the runs were finally decreased to 1090 °C at rate of 1.3 °C/h and maintained for 67 h. For Batch#H08, runs were first heated at 1350 °C for 2 h, cooled and maintained at 1150 °C for 2 h; runs were then oscillated between 1080 and 1130 °C for 5 rounds with a heating and cooling rate of 200 and 6 °C/h, respectively; and the runs were finally decreased to 1080 °C at rate of 1 °C/h and maintained for 100 h. For Batch#H09, runs were first heated at 1350 °C for 2 h, cooled and maintained at 1150 °C for 2 h; runs were then oscillated between 1070 and 1130 °C for 5 rounds with a heating and cooling rate of 180 and 7.2 °C/h, respectively; and the runs were finally decreased to 1070 °C at rate of 1.2 °C/h and maintained for 40 h.

**Fig. S2**

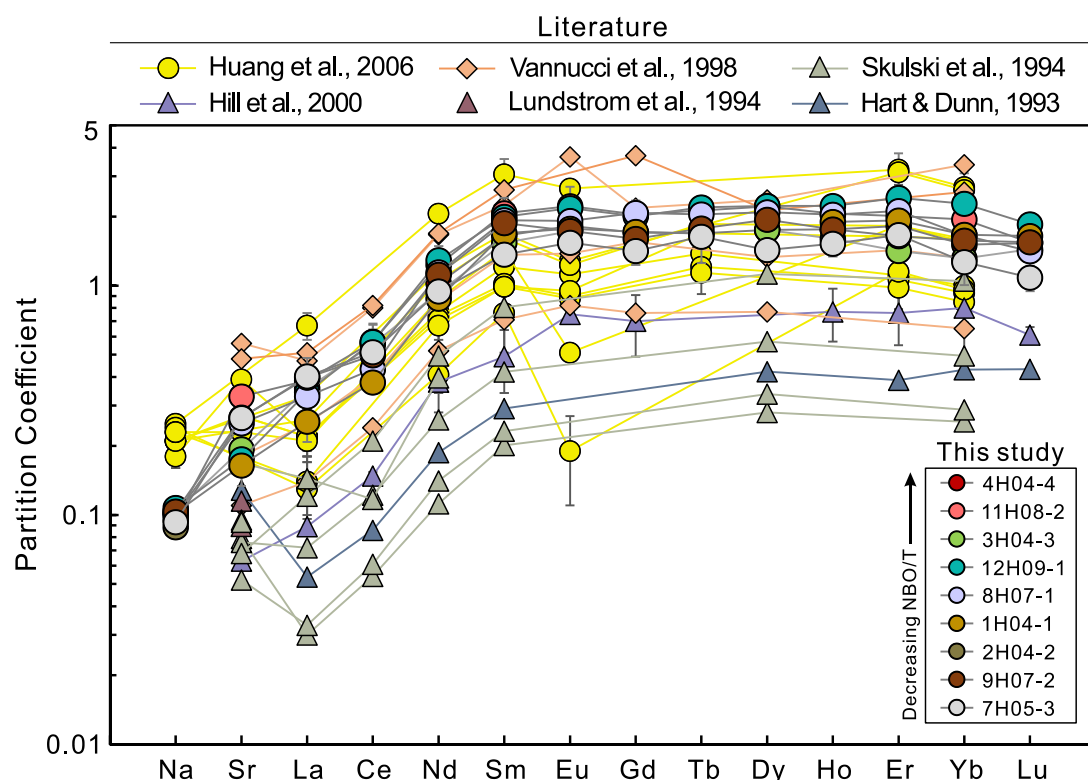

**Fig. S2.** Cpx–melt LILE (Na, Sr) and REE partition coefficient patterns obtained from nine representative runs with a range of melt NBO/T (0.10–0.22) in this study. The partitioning data from the literature, filtered based on diopsidic cpx with  $^{iv}\text{Al} < 0.20$ , are shown for comparison.

**Fig. S3**

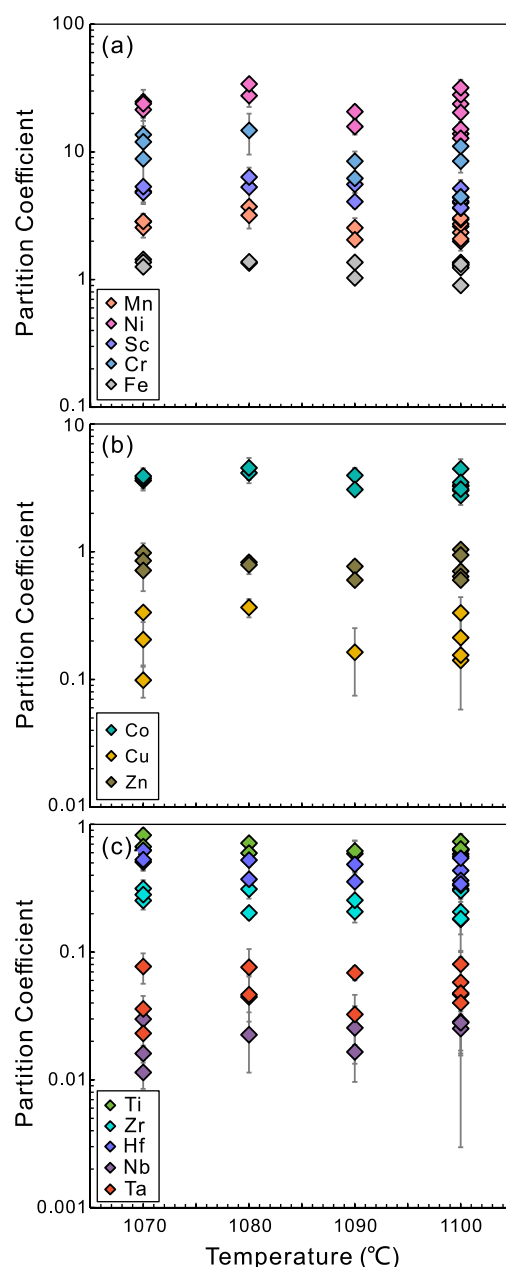

**Fig. S3.** Partition coefficients of (a) Mn, Ni, Sc, Cr, Fe, (b) Co, Cu, Zn, and (c) Ti, Zr, Hf, Nb, and Ta between cpx and melt as a function of equilibrium temperature.

**Fig. S4**

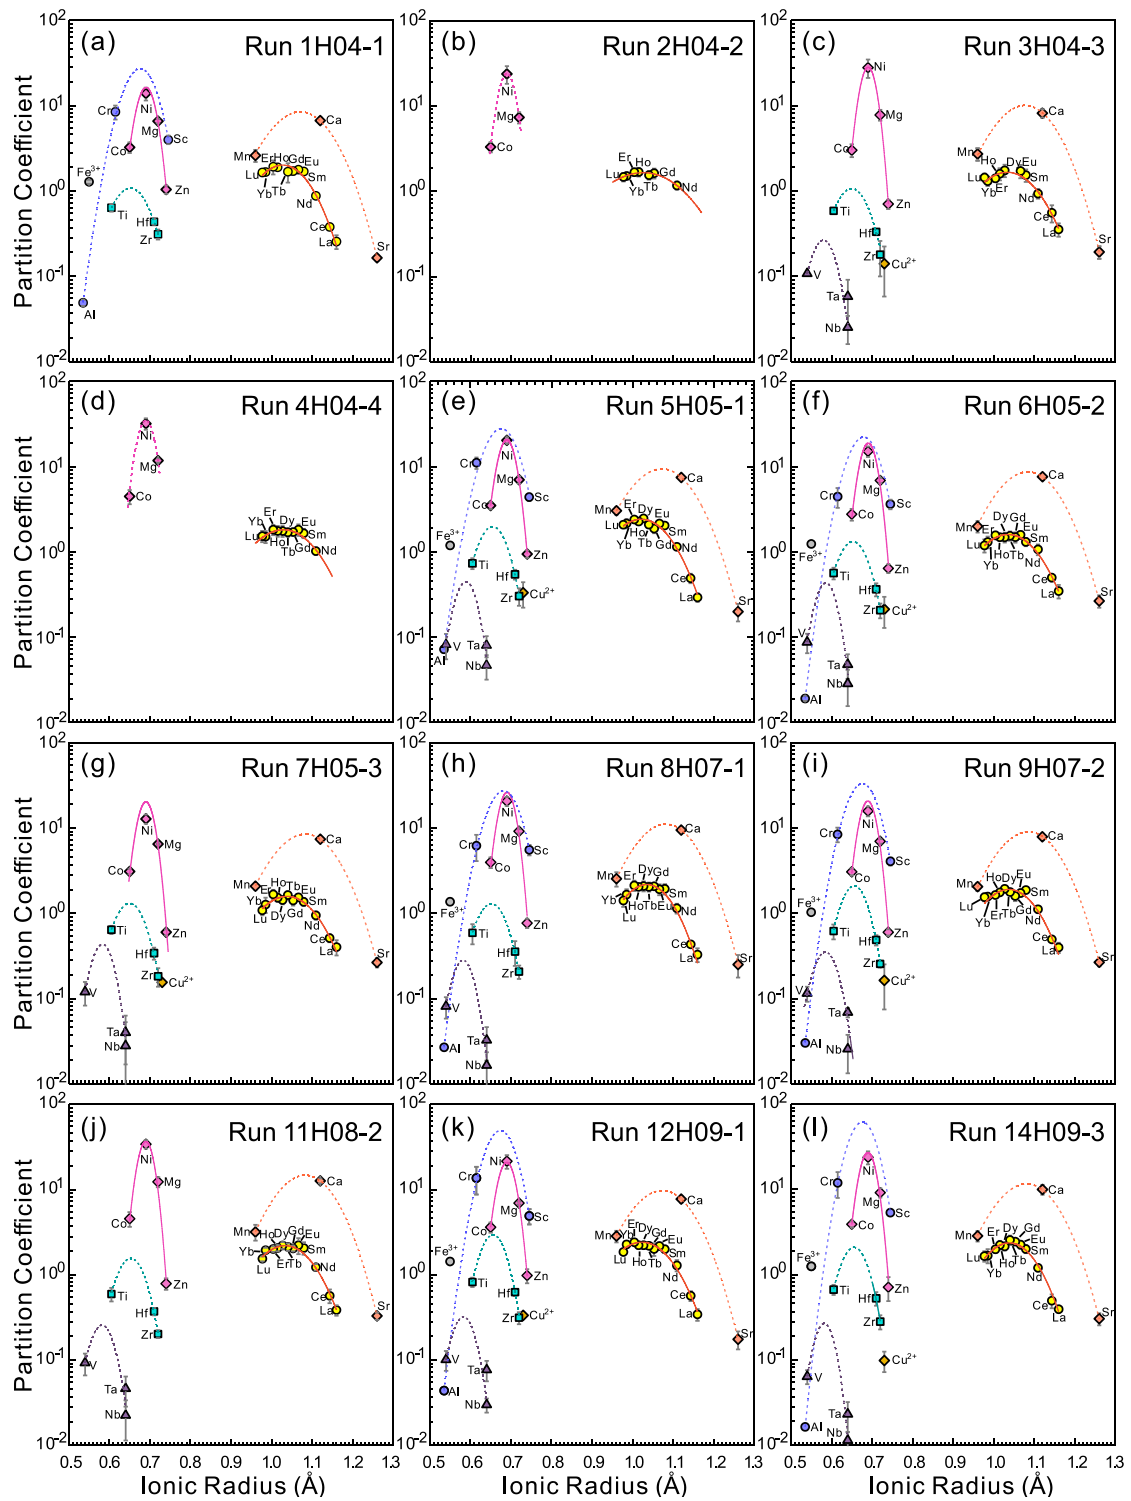

**Fig. S4.** Onuma diagrams showing partition coefficients for di-, tri-, tetra-, and pentavalent cations between cpx and melt as a function of ionic radii (in Å; Shannon, 1976). Ionic radii in VI- and VIII-fold coordination are taken for cations on the M1 and M2 site, respectively. The partitioning data are from 12 runs reported in this study.

**Fig. S5**

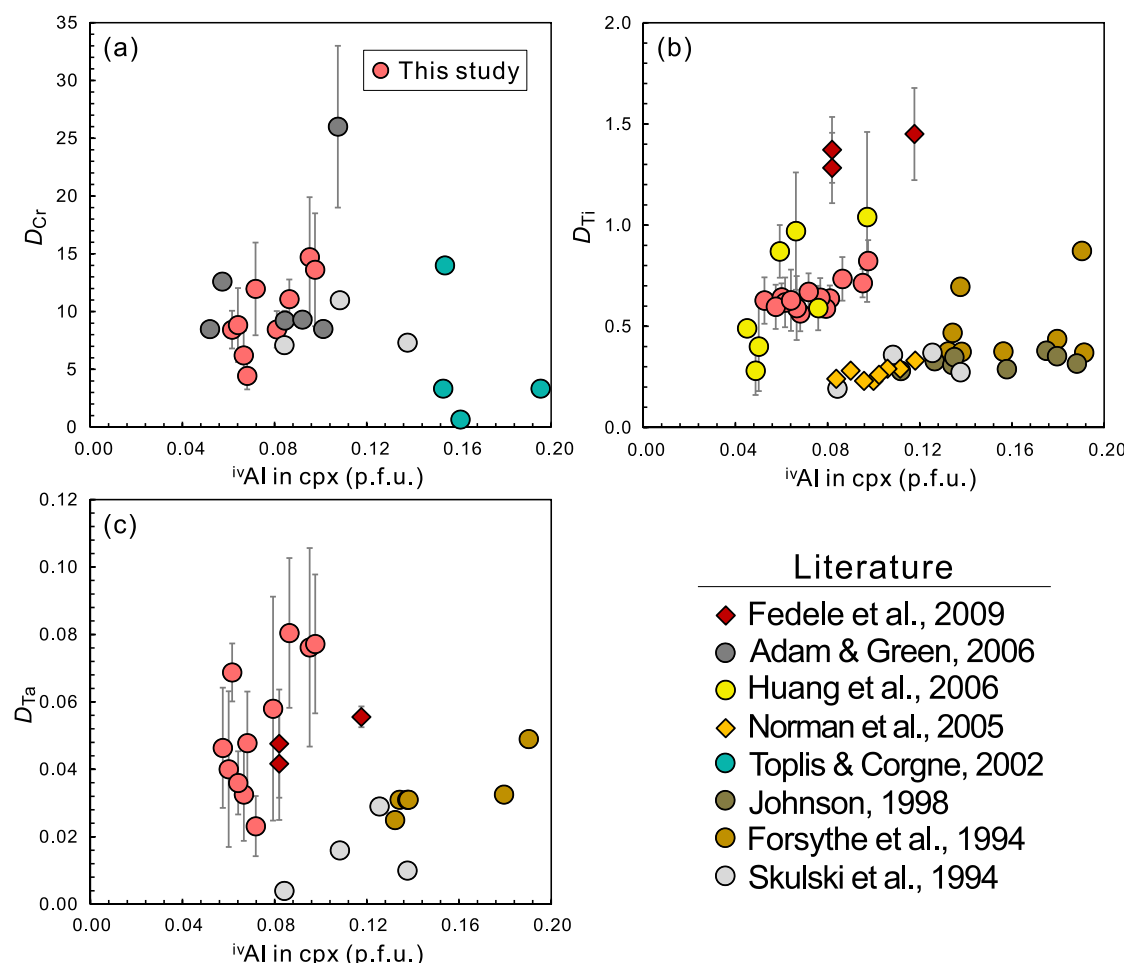

**Fig. S5.** Partition coefficients of (a) Cr, (b) Ti, and (c) Ta between cpx and melt as a function of  $ivAl$  content (p.f.u.) of the cpx. Other partition coefficients for diopsidic cpx with  $ivAl < 0.2$  from the literature are shown for comparison.

**Fig. S6**

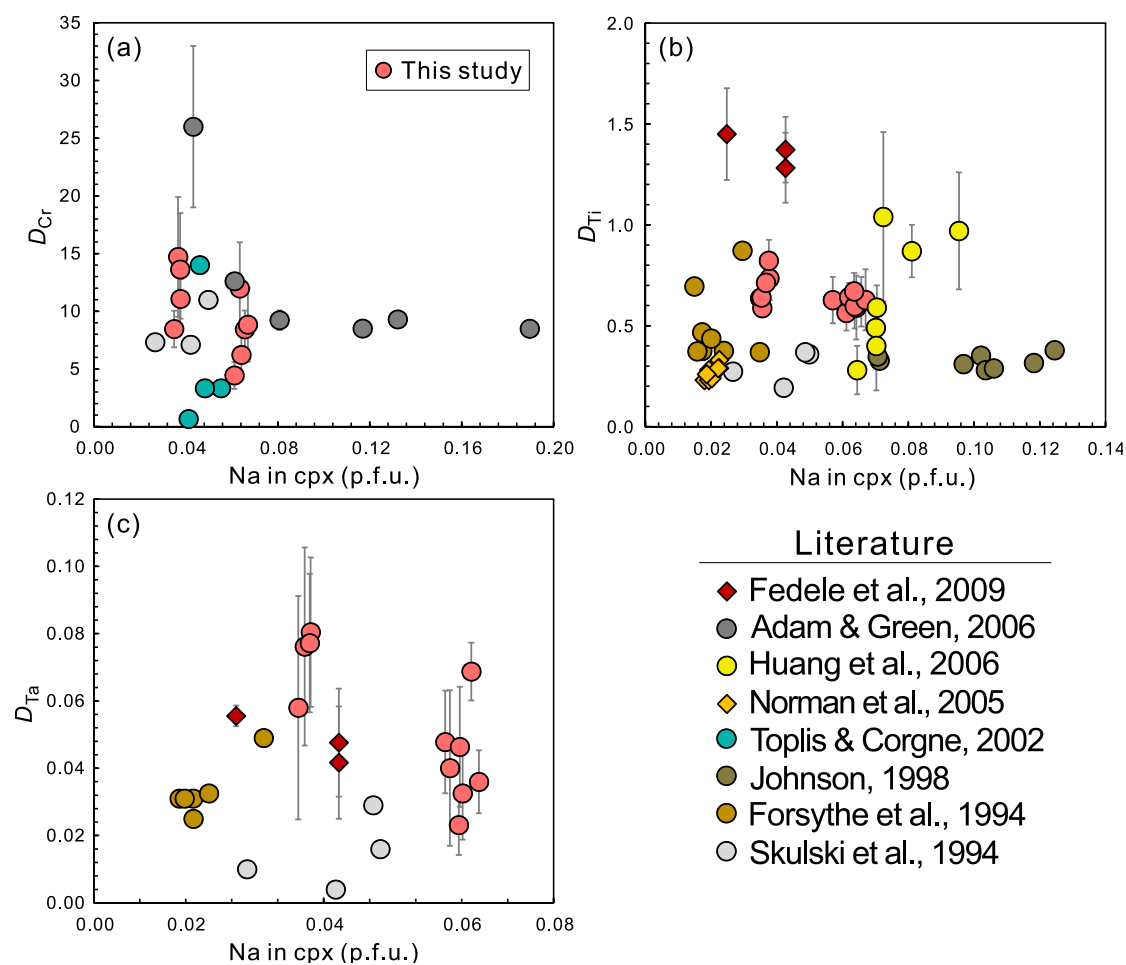

**Fig. S6.** Partition coefficients of (a) Cr, (b) Ti, and (c) Ta between cpx and melt as a function of Na content (p.f.u.) of the cpx. Other partition coefficients for diopsidic cpx with  $^{iv}Al < 0.2$  from the literature are shown for comparison.

## References

- Adam, J., and Green, T. (2006) Trace element partitioning between mica- and amphibole-bearing garnet lherzolite and hydrous basanitic melt: 1. Experimental results and the investigation of controls on partitioning behaviour. *Contributions to Mineralogy and Petrology*, 152, 1-17.
- Fedele, L., Zanetti, A., Morra, V., Lustrino, M., Melluso, L., and Vannucci, R. (2009) Clinopyroxene/liquid trace element partitioning in natural trachyte-trachyphonolite systems: Insights from Campi Flegrei (southern Italy). *Contributions to Mineralogy and Petrology*, 158, 337-356.
- Forsythe, L.M., Nielsen, R.L., and Fisk, M.R. (1994) High-field-strength element partitioning between pyroxene and basaltic to dacitic magmas. *Chemical Geology*, 117, 107-125.
- Hart, S.R., and Dunn, T. (1993) Experimental cpx/melt partitioning of 24 trace elements. *Contributions to Mineralogy and Petrology*, 113, 1-8.
- Hill, E., Wood, B.J., and Blundy, J.D. (2000) The effect of Ca-Tschermaks component on trace element partitioning between clinopyroxene and silicate melt. *Lithos*, 53, 203-215.
- Huang, F., Lundstrom, C., and McDonough, W. (2006) Effect of melt structure on trace-element partitioning between clinopyroxene and silicic, alkaline, aluminous melts. *American Mineralogist*, 91, 1385-1400.
- Johnson, K.T.M. (1998) Experimental determination of partition coefficients for rare earth and high-field-strength elements between clinopyroxene, garnet, and basaltic melt at high pressures. *Contributions to Mineralogy and Petrology*, 133, 60-68.
- Lundstrom, C.C., Shaw, H.F., Ryerson, F.J., Phinney, D.L., Gill, J.B., and Williams, Q. (1994) Compositional controls on the partitioning of U, Th, Ba, Pb, Sr and Zr between clinopyroxene and haplobasaltic melts: implications for uranium series disequilibria in basalts. *Earth and Planetary Science Letters*, 128, 407-423.
- Morimoto, N. (1988) Nomenclature of pyroxenes. *Mineralogy and Petrology*, 39, 55-76.
- Norman, M., Garcia, M.O., and Pietruszka, A.J. (2005) Trace-element distribution coefficients for pyroxenes, plagioclase, and olivine in evolved tholeiites from the 1955 eruption of Kilauea Volcano, Hawai', and petrogenesis of differentiated rift-zone lavas. *American Mineralogist*, 90, 888-899.
- Shannon, R. D. (1976) Revised effective ionic radii and systematic studies of interatomic distances in halides and chalcogenides. *Acta Crystallographica*, A32, 751-767.
- Skulski, T., Minarik, W., and Watson, E.B. (1994) High-pressure experimental trace-element partitioning between clinopyroxene and basaltic melts. *Chemical Geology*, 117, 127-147.
- Toplis, M.J., and Corgne, A. (2002) An experimental study of element partitioning between magnetite, clinopyroxene and iron-bearing silicate liquids with particular emphasis on vanadium. *Contributions to Mineralogy and Petrology*, 144, 22-37.
- Vannucci, R., Bottazzi, P., Wulff-Pedersen, E., and Neumann, E.-R. (1998) Partitioning of REE, Y, Sr, Zr and Ti between clinopyroxene and silicate melts in the mantle under La Palma (Canary Islands): implications for the nature of the metasomatic agents. *Earth and Planetary Science Letters*, 158, 39-51.
