# Supplementary material for: Crystal vs. melt compositional effects on the partitioning of the first-row transition and high field strength elements between clinopyroxene and silicic, alkaline, aluminous melts
Source: publisher site journal article supplement (doi:10.2138/am-2022-8586), 2022-11-16
Supplement: Supplementary file 1 [file 8586_supp2.xlsx]

## Sheet: Table S1
American Mineralogist: October 2023 Online Materials AM-23-108586 (use tabs to navigate to other tables)
He et al.: Crystal vs. melt effects on trace-element partitioning
Table S1. Experimental conditions and run products.
Run No.	Batch	Starting material	P	Tinitial (oC)	Tfinal (oC)	Duration (h)	Time at Tfinal (h)	Run products
1H04-1	H04	HISILA	1 atm	1450	1100	138.5	50	Cpx, melt
2H04-2	H04	HISILB	1 atm	1450	1100	138.5	50	Cpx, melt
3H04-3	H04	HISILA4D	1 atm	1450	1100	138.5	50	Cpx, melt
4H04-4	H04	HISILA8D	1 atm	1450	1100	138.5	50	Cpx, melt
5H05-1	H05	*HISILA	1 atm	1450	1100	183.25	68	Cpx, melt
6H05-2	H05	*HISILB	1 atm	1450	1100	183.25	68	Cpx, melt
7H05-3	H05	*HISILC	1 atm	1450	1100	183.25	68	Cpx, melt
8H07-1	H07	HISILB	1 atm	1350	1090	174.5	67	Cpx, melt
9H07-2	H07	HISILC	1 atm	1350	1090	174.5	67	Cpx, melt
10H08-1	H08	†HISILA	1 atm	1350	1080	230	100	Cpx, melt
11H08-2	H08	†HISILB	1 atm	1350	1080	230	100	Cpx, melt
12H09-1	H09	‡HISILA	1 atm	1350	1070	170.5	40	Cpx, melt
13H09-2	H09	‡HISILB	1 atm	1350	1070	170.5	40	Cpx, melt
14H09-3	H09	‡HISILC	1 atm	1350	1070	170.5	40	Cpx, melt
Notes: the runs in the same batch were conducted under the same experimental conditions; the starting materials (*) of batch H05 were taken from the residues of batch H04, the starting materials (†) of batch H08 were taken from the residues of batch H07, and starting materials (‡) of batch H09 were taken from the residues of batch H08.

## Sheet: Table S2
American Mineralogist: October 2023 Online Materials AM-23-108586 (use tabs to navigate to other tables)
He et al.: Crystal vs. melt effects on trace-element partitioning
Table S2. Trace element compositions of starting materials in ppm, as measured by LA-ICP-MS under single-spot (30 mm) analytical mode.
Element		HISILA	HISILA4D	HISILA8D	HISILB	HISILC
n	Unit	8	8	7	8	8
Mn	ppm	348(3)	342(15)	338(20)	251(10)	424(2)
Ni	ppm	357(5)	336(18)	328(17)	264(10)	431(8)
Sc	ppm	394(3)	393(7)	391(10)	313(3)	508(6)
V	ppm	396(2)	395(4)	392(7)	310(4)	490(4)
Co	ppm	364(4)	351(13)	346(19)	284(2)	470(4)
Cu	ppm	212(4)	208(12)	248(7)	169(2)	703(6)
Zn	ppm	356(7)	340(10)	346(22)	266(5)	480(8)
Nb	ppm	353(2)	352(3)	348(4)	574(4)	335(2)
Ta	ppm	230(2)	226(3)	233(4)	307(8)	191(1)
Zr	ppm	349(4)	349(5)	350(6)	530(8)	330(4)
Hf	ppm	275(3)	270(4)	282(6)	457(9)	300(3)
Rb	ppm	304(1)	306(5)	307(6)	288(2)	175(2)
Sr	ppm	368(4)	364(9)	363(11)	340(3)	230(2)
La	ppm	279(2)	274(5)	275(9)	250(4)	203(1)
Ce	ppm	311(3)	303(5)	305(11)	300(3)	251(2)
Nd	ppm	259(3)	262(8)	263(9)	253(4)	215(4)
Sm	ppm	289(3)	283(7)	288(9)	288(8)	235(4)
Eu	ppm	184(3)	181(3)	183(6)	185(3)	148(1)
Gd	ppm	216(2)	207(3)	212(9)	194(5)	150(3)
Tb	ppm	201(2)	296(3)	200(6)	190(5)	149(1)
Dy	ppm	212(2)	211(6)	215(7)	190(4)	155(2)
Ho	ppm	191(2)	188(4)	193(6)	194(4)	146(1)
Er	ppm	217(3)	216(5)	221(7)	208(6)	157(2)
Yb	ppm	109(1)	106(4)	109(4)	110(3)	119(2)
Lu	ppm	118(1)	116(3)	119(4)	99(2)	113(2)

## Sheet: Table S3
American Mineralogist: October 2023 Online Materials AM-23-108586 (use tabs to navigate to other tables)
He et al.: Crystal vs. melt effects on trace-element partitioning
Table S3. A summary of time-temperature paths for the successful experiments.
Batch#H04		Batch#H05		Batch#H07		Batch#H08		Batch#H09
Time (min)	T (°C)	Time (min)	T (°C)	Time (min)	T (°C)	Time (min)	T (°C)	Time (min)	T (°C)
0	1450	0	1300	0	1350	0	1350	0	1350
30	1450	40	1300	120	1350	120	1350	120	1350
90	1150	100	1150	240	1150	240	1150	240	1150
270	1150	220	1150	360	1150	360	1150	360	1150
300	1130	240	1130	385	1130	365	1130	370	1130
600	1100	540	1100	785	1090	865	1080	870	1070
1200	1100	1140	1100	1085	1090	1165	1080	1170	1070
1220	1130	1155	1130	1100	1130	1180	1130	1190	1130
1370	1130	1215	1130	1160	1130	1240	1130	1250	1130
1670	1100	1515	1100	1560	1090	1740	1080	1750	1070
2270	1100	2115	1100	1860	1090	2040	1080	2050	1070
2290	1130	2130	1130	1875	1130	2055	1130	2070	1130
2440	1130	2190	1130	1935	1130	2115	1130	2130	1130
2740	1100	2490	1100	2335	1090	2615	1080	2630	1070
3340	1100	3090	1100	2635	1090	2915	1080	2930	1070
3360	1130	3105	1130	2650	1130	2930	1130	2950	1130
3510	1130	3165	1130	2710	1130	2990	1130	3010	1130
5310	1100	3465	1100	3110	1090	3490	1080	3510	1070
8310	1100	4065	1100	3710	1090	3790	1080	3810	1070
		4080	1130	3725	1130	3805	1130	3830	1130
		4140	1130	3875	1130	3865	1130	3890	1130
		4440	1100	5675	1090	4365	1080	4390	1070
		5040	1100	9695	1090	4665	1080	4690	1070
		5055	1130			4680	1130	4710	1130
		5115	1130			4800	1130	4830	1130
		6915	1100			7800	1080	7830	1070
		10995	1100			13800	1080	10230	1070

## Sheet: Table S4
American Mineralogist: October 2023 Online Materials AM-23-108586 (use tabs to navigate to other tables)
He et al.: Crystal vs. melt effects on trace-element partitioning
Table S4. Major element compositions of the SPI standard glass and pyroxene in wt%, as measured by EPMA.
	Basalt glass		Obsidian glass		Chrome-diopside
Element	This study	TRUE	This study	TRUE	This study	TRUE
n	3		3		3
SiO2	54.40(13)	54.1	74.16(7)	73.94	54.42(11)	54.59
Al2O3	13.47(11)	13.5	13.08(12)	13.11	0.30(2)
FeO	13.01(24)	12.42	1.66(2)	1.72	1.35(7)	1.39
MgO	3.69(7)	3.59	0.04(3)	0.1	17.28(63)	17.14
CaO	7.45(18)	7.12	0.76(1)	0.76	25.46(34)	25.5
Na2O	3.52(10)	3.16	4.24(5)	4.06	0.42(6)	0.44
K2O	1.77(4)	1.79	5.06(10)	5.04	-	-
TiO2	2.27(4)	2.26	0.08(4)	0.1	0.06(1)	0.1
Cr2O3	0.02(2)	-	0.03(3)	-	0.52(3)	0.5
MnO	0.15(5)	-	0.045(3)	0.06	0.02(1)	-
NiO	-	-	0.01(2)	-	0.037(1)	-
Total	99.7487		99.1593	98.89	99.8767	99.66

## Sheet: Table S5
American Mineralogist: October 2023 Online Materials AM-23-108586 (use tabs to navigate to other tables)
He et al.: Crystal vs. melt effects on trace-element partitioning
Table S5. Major and trace element results for USGS glasses (BIR-1G, BHVO-2G, BCR-2G), MPI-DING glasses (ML3B-G, StHs6/80-G, T1-G), and the Chinese Geological Standard Glass CGSG-1 under different analytical modes by LA-ICP-MS.
Sample			BIR-1G (basalt, QC)					BHVO-2G (basalt, QC)					BHVO-2G (basalt, QC)					BCR-2G (basalt, QC)					ML3B-G (tholeiitic basalt, QC)					StHs6/80-G (andesitic ash, QC)					StHs6/80-G (andesitic ash, QC)					T1-G (Alps quartz diorite, QC)					CGSG-1 (alkali basalt from Tibet, QC)					CGSG-1 (alkali basalt, QC)
Spot size			Single-spot mode (20 μm, n = 8)					Single-spot mode (20 μm, n = 8)					Single-spot mode (10 μm, n = 2)					Single-spot mode (20 μm, n = 8)					Single-spot mode (20 μm, n = 6)					Single-spot mode (20 μm, n = 6)					Single-spot mode (12 μm, n = 2)					Single-spot mode (20 μm, n = 6)					Single-spot mode (15 μm, n = 6)					Line scanning mode (10 μm, n = 1)
Element	Isotope	Unit	Ref. value	Ave.	1s	% RSD	RD (%)	Ref. value	Ave.	1s	% RSD	RD (%)	Ref. value	Ave.	1s	% RSD	RD (%)	Ref. value	Ave.	1s	% RSD	RD (%)	Ref. value	Ave.	1s	% RSD	RD (%)	Ref. value	Ave.	1s	% RSD	RD (%)	Ref. value	Ave.	1s	% RSD	RD (%)	Ref. value	Ave.	1s	% RSD	RD (%)	Ref. value	Ave.	1s	% RSD	RD (%)	Ref. value	Ave.
SiO2	29	wt%	47.5058	47.6526	0.71325	0.0149677	0.0030904	49.3061	49.3961	0.777597	0.0157421	0.00182535	49.3061	52.4595	0.191045	0.00364175	0.0639576	54.4067	53.612	2.49864	0.046606	-0.014607	51.4	49.8736	2.36285	0.0473768	-0.0296956	63.7	61.8822	2.50529	0.0404847	-0.0285362	63.7	66.2366	0.814058	0.0122902	0.0398203	58.6	57.5309	2.02298	0.0351633	-0.0182437	52.7	51.8637	2.28178	0.0439957	-0.015869	52.7	49.2458
Al2O3	27	wt%	15.498	15.5216	0.257139	0.0165665	0.00152258	13.5982	12.9301	0.79635	0.0615887	-0.0491328	13.5982	12.6015	0.195312	0.0154991	-0.0732978	13.3983	13.9064	0.390676	0.0280933	0.0379252	13.6	14.3301	0.565686	0.0394755	0.0536802	17.8	18.4882	1.11484	0.0602998	0.0386642	17.8	16.0393	0.305988	0.0190774	-0.0989172	17.1	17.4269	0.946806	0.05433	0.0191192	17.4	17.9904	1.11506	0.0619812	0.0339287	17.4	20.5626
FeO	57	wt%	10.4	10.5055	0.857619	0.081635	0.0101508	11.3	11.5859	1.05563	0.0911139	0.0253025	11.3	12.9172	0.70693	0.0547277	0.143122	12.4	13.4211	2.27034	0.169162	0.0823501	10.9	12.0511	2.31863	0.1924	0.105606	4.37	4.80437	0.964543	0.200764	0.0993987	4.37	4.89988	0.486886	0.099367	0.121253	6.44	7.09281	1.38781	0.195665	0.101368	7.77	8.91191	1.03184	0.115782	0.146964	7.77	7.28857
MgO	25	wt%	9.40113	9.48223	0.453131	0.0477874	0.00862625	7.13086	7.1366	0.459996	0.0644558	0.000805216	7.13086	5.94948	0.170778	0.0287047	-0.165672	3.56043	3.58832	0.257456	0.0717484	0.00783225	6.59	6.87594	0.478099	0.0695322	0.0433906	1.97	2.14307	0.211701	0.0987842	0.0878509	1.97	1.55194	0.119763	0.0771703	-0.212215	3.75	3.90244	0.361612	0.092663	0.0406503	3.92	4.0193	0.29306	0.0729132	0.0253324	3.92	4.29058
CaO	42	wt%	13.3001	13.4487	0.447531	0.0332768	0.0111758	11.4001	11.2057	0.566012	0.0505111	-0.0170525	11.4001	10.0012	0.35546	0.0355416	-0.122707	7.06006	7.27837	0.454078	0.0623873	0.0309219	10.5	11.2025	0.462448	0.0412808	0.0669036	5.28	5.47992	0.351043	0.0640599	0.0378642	5.28	4.78286	0.101191	0.021157	-0.0941555	7.1	7.29095	0.24359	0.03341	0.026894	5.86	5.78403	0.446383	0.0771751	-0.0129642	5.86	7.09076
Na2O	23	wt%	1.85015	1.91815	0.0821857	0.0428463	0.0367545	2.40019	2.27176	0.17908	0.0788288	-0.0535093	2.40019	2.41068	0.0470552	0.0195195	0.004368	3.23026	3.22873	0.0703237	0.0217806	-0.000475633	2.4	2.49783	0.078305	0.0313492	0.0407645	4.44	4.71939	0.238824	0.0506048	0.062926	4.44	4.26421	0.0250238	0.00586832	-0.0395915	3.13	3.4172	0.179414	0.0525033	0.0917569	3.8	3.86548	0.332604	0.0860448	0.0172311	3.8	3.49619
K2O	39	wt%	0.0220442	0.0212038	0.00179238	0.0845312	-0.0381227	0.514364	0.516149	0.0326317	0.0632214	0.00346945	0.514364	0.562671	0.000139366	0.000247686	0.0939165	1.79485	1.7838	0.0566322	0.0317481	-0.00615868	0.385	0.390252	0.0181471	0.046501	0.0136405	1.29	1.31946	0.0985635	0.0747	0.0228356	1.29	1.20707	0.0294938	0.0244342	-0.0642868	1.96	2.03424	0.114857	0.0564617	0.0378767	3.93	3.56967	0.402274	0.112692	-0.0916863	3.93	3.68243
TiO2	47	wt%	0.900882	0.9569	0.0389823	0.0407381	0.062181	2.71933	2.74095	0.118706	0.0433083	0.00795176	2.71933	2.39238	0.0871485	0.0364275	-0.120231	2.3523	2.30789	0.0433308	0.0187751	-0.0188811	2.13	2.13772	0.0438286	0.0205025	0.00362269	0.703	0.716188	0.0303808	0.0424202	0.0187594	0.703	0.652396	0.0031058	0.0047606	-0.0719827	0.755	0.751239	0.028805	0.0383433	-0.00498189	2.19	2.10469	0.220465	0.104749	-0.0389522	2.19	2.54419
MnO	55	wt%	0.190007	0.182634	0.00888856	0.0486687	-0.0388006	0.170006	0.180172	0.0141763	0.0786821	0.0597996	0.170006	0.161008	0.00324145	0.0201322	-0.0529256	0.200136	0.206638	0.00961958	0.0465528	0.0324882	0.17	0.178866	0.00736806	0.0411932	0.0521523	0.076	0.0793703	0.00340395	0.0428869	0.0443463	0.076	0.0727216	0.000237458	0.0032653	-0.0431374	0.127	0.142286	0.00321882	0.0226222	0.120363	0.123	0.133129	0.00839881	0.0630876	0.0823513	0.123	0.132761
Cr	53	ppm	392	389.227	40.5611	0.104209	-0.00707353	293	291.345	28.0215	0.0961798	-0.00564735	293	310.129	47.0935	0.151852	0.0584592	17	16.2279	9.85991	0.607589	-0.0454162	177	156.804	10.7535	0.0685796	-0.114104	16.9	14.8624	10.0489	0.676132	-0.120568	16.9	-	-	-	-	20.9	15.1607	7.14494	0.471282	-0.27461	58	36.7513	2.52998	0.0688405	-0.366358	58	33.5571
Ni	60	ppm	178	179.761	10.3089	0.0573478	0.00989111	116	123.124	5.85535	0.0475566	0.0614126	116	106.244	4.57156	0.0430289	-0.0841037	13	12.4098	6.72793	0.542146	-0.0453995	107	110.342	8.41429	0.0762563	0.0312359	23.7	20.8333	4.54165	0.218	-0.120959	23.7	17.6913	2.28088	0.128926	-0.25353	10.6	10.8258	3.81519	0.352416	0.0213009	37.1	42.9935	10.4243	0.242462	0.158856	37.1	43.0521
Sc	45	ppm	43	43.5369	2.3848	0.0547766	0.0124864	33	30.87	2.46697	0.0799148	-0.0645456	33	28.6828	1.66458	0.0580342	-0.130826	33	35.6638	2.30974	0.0647642	0.0807218	31.6	34.0107	2.46249	0.0724034	0.076287	11.5	11.2698	2.67389	0.237261	-0.0200133	11.5	8.84461	0.60189	0.0680517	-0.230904	26.9	26.9121	1.83104	0.0680379	0.000449137	12.2	12.0272	3.07816	0.255934	-0.0141664	12.2	10.4129
V	51	ppm	326	319.295	18.2058	0.0570188	-0.0205671	308	317.865	21.3328	0.0671128	0.0320285	308	285.387	8.19475	0.0287145	-0.0734183	425	430.218	19.5437	0.0454275	0.0122775	268	292.031	13.234	0.0453171	0.0896664	90.3	87.0671	3.72901	0.0428292	-0.0358018	90.3	76.1361	0.144977	0.00190419	-0.156854	190	196.459	7.07499	0.0360125	0.0339969	144	146.298	5.54143	0.0378776	0.0159598	144	139.662
Co	59	ppm	52	53.1315	1.3243	0.0249249	0.0217592	44	44.0255	1.14091	0.0259147	0.000580594	44	44.9828	0.59809	0.013296	0.0223366	38	36.9727	1.82537	0.0493707	-0.0270353	41.2	43.7801	1.28987	0.0294626	0.0626231	13.2	12.7871	1.11406	0.0871237	-0.031282	13.2	10.8589	0.225526	0.0207688	-0.17736	18.9	19.3907	0.714387	0.0368417	0.0259622	24	22.5293	1.14455	0.0508026	-0.0612789	24	28.1576
Cu	65	ppm	119	119.941	6.33808	0.0528435	0.00790434	127	128.262	5.90705	0.0460545	0.00993704	127	142.992	5.50557	0.0385026	0.125924	21	18.797	1.4912	0.0793321	-0.104906	112	116.265	4.36791	0.0375686	0.0380801	41.5	37.3078	2.82965	0.0758459	-0.101016	41.5	42.2144	0.808978	0.0191635	0.0172153	18.8	17.0477	3.90033	0.228789	-0.093209	18.9	16.9034	1.46276	0.0865364	-0.105643	18.9	16.0188
Zn	66	ppm	78	71.1042	4.56503	0.064202	-0.0884079	102	106.035	8.26795	0.0779735	0.0395631	102	91.9603	11.0141	0.11977	-0.0984283	125	130.931	10.622	0.0811268	0.0474474	108	104.202	9.11966	0.0875193	-0.0351693	67	61.9288	6.01464	0.0971219	-0.0756901	67	49.729	3.72341	0.0748739	-0.257776	74	57.9551	8.40405	0.14501	-0.216823	162	141.401	23.1718	0.163873	-0.127152	162	128.347
Nb	93	ppm	0.52	0.47438	0.0488074	0.102887	-0.0877312	18.3	18.6423	1.19425	0.0640616	0.0187045	18.3	15.1705	0.215506	0.0142057	-0.171013	12.5	12.5696	0.496541	0.0395032	0.00557061	8.61	8.80796	0.238881	0.027121	0.0229924	6.94	7.64965	0.759619	0.0993011	0.102256	6.94	6.23276	0.142006	0.0227838	-0.101908	8.87	8.98991	0.83888	0.0933134	0.0135189	52.8	54.8555	1.66907	0.0304266	0.0389309	52.8	53.7288
Ta	181	ppm	0.036	0.0348822	0.0196674	0.563823	-0.0310489	1.15	1.23406	0.0782228	0.0633867	0.0730934	1.15	0.982286	0.0380106	0.0386961	-0.145838	0.78	0.800028	0.122566	0.153202	0.025677	0.555	0.727662	0.26328	0.361816	0.311103	0.42	0.498264	0.0591305	0.118673	0.186342	0.42	0.307193	0.0453354	0.14758	-0.268589	0.464	0.462181	0.0690166	0.149328	-0.00392017	2.59	2.95238	0.127877	0.0433133	0.139916	2.59	3.27717
Zr	90	ppm	14	13.5935	1.08035	0.0794757	-0.0290343	170	157.109	10.2478	0.0652271	-0.0758276	170	152.02	4.35379	0.0286396	-0.105765	184	196.347	8.79997	0.0448185	0.0671033	122	140.5	6.97683	0.0496573	0.151635	118	132.819	8.50259	0.0640166	0.125581	118	117.21	0.483394	0.00412416	-0.00669278	144	155.807	8.85976	0.0568637	0.0819926	546	561.864	49.4883	0.0880789	0.0290543	546	605.732
Hf	178	ppm	0.57	0.588992	0.0816663	0.138654	0.0333196	4.32	3.97553	0.514747	0.129479	-0.0797378	4.32	4.95288	0.0635139	0.0128236	0.1465	4.84	5.13316	0.354212	0.0690048	0.0605701	3.22	4.07424	0.305494	0.0749818	0.265292	3.07	3.29272	0.524992	0.15944	0.072548	3.07	3.45643	0.079765	0.0230773	0.125873	3.88	4.24732	0.344278	0.0810578	0.0946692	11.6	11.865	1.43361	0.120826	0.0228471	11.6	14.7825
Rb	85	ppm	0.197	0.298644	0.161981	0.54239	0.515957	9.2	9.37554	1.17968	0.125825	0.0190803	9.2	9.44751	0.322769	0.0341645	0.0269032	47	46.5892	1.49064	0.0319953	-0.00874126	5.8	5.96169	0.254295	0.0426549	0.0278768	30.7	30.8453	2.19079	0.0710251	0.00473404	30.7	27.3274	0.668414	0.0244594	-0.109855	79.7	86.2921	4.03375	0.0467453	0.0827111	106	97.1859	10.2258	0.105219	-0.0831515	106	106.68
Sr	88	ppm	109	109.569	4.41637	0.0403068	0.00522008	396	396.857	26.5416	0.0668795	0.00216479	396	350.191	6.54636	0.0186937	-0.11568	342	347.479	13.9184	0.0400555	0.0160192	312	332.801	10.8593	0.0326299	0.0666706	482	530.103	29.7187	0.0560621	0.0997997	482	439.882	10.3537	0.0235375	-0.087381	284	298.021	6.70026	0.0224825	0.0493703	1317	1306.09	75.4558	0.0577721	-0.00828071	1317	1566.44
Ba	137	ppm	6.5	6.00121	0.920928	0.153457	-0.0767373	131	131.342	11.8143	0.0899507	0.00261365	131	117.652	3.20969	0.0272813	-0.101895	683	678.208	26.4334	0.0389753	-0.0070159	80.1	81.7772	3.90687	0.0477746	0.0209386	298	312.011	9.62589	0.0308511	0.0470166	298	279.6	0.253309	0.000905969	-0.0617436	388	407.407	23.616	0.0579667	0.0500187	2243	2139.42	201.523	0.0941952	-0.0461789	2243	2515.9
La	139	ppm	0.609	0.604061	0.0604955	0.100148	-0.00811052	15.2	14.4166	1.08782	0.0754565	-0.0515416	15.2	13.6549	0.652011	0.047749	-0.101648	24.7	25.1109	0.791311	0.0315127	0.0166351	8.99	9.85622	0.555723	0.056383	0.0963539	12	12.6042	0.513913	0.0407731	0.0503515	12	10.6999	0.0800125	0.00747785	-0.108339	70.4	70.0571	3.14445	0.0448841	-0.0048711	164	158.036	9.75225	0.0617092	-0.0363685	164	197.945
Ce	140	ppm	1.89	1.75125	0.242378	0.138402	-0.0734107	37.6	37.307	2.50381	0.0671137	-0.00779194	37.6	34.4407	1.70759	0.0495806	-0.0840227	53.3	53.0303	1.5942	0.030062	-0.00506092	23.1	24.1618	0.772436	0.0319694	0.0459637	26.1	26.7629	1.19048	0.0444824	0.0253982	26.1	24.7871	0.514543	0.0207586	-0.0503045	127	130.512	7.88244	0.0603962	0.0276546	349	330.027	14.347	0.043472	-0.0543636	349	385.757
Nd	143	ppm	2.37	2.43266	0.258649	0.106323	0.0264404	24.5	22.8	1.77667	0.0779241	-0.0693886	24.5	22.0229	0.0808677	0.00367198	-0.101105	28.9	29.6147	1.57558	0.0532026	0.0247304	16.7	18.3233	1.32649	0.0723941	0.0972008	13	13.9751	0.789453	0.0564899	0.0750084	13	11.2893	0.357494	0.0316666	-0.131592	41.4	38.9909	4.02248	0.103165	-0.0581896	132	121.341	12.5514	0.103439	-0.0807492	132	143.231
Sm	147	ppm	1.09	1.17019	0.370467	0.316586	0.0735734	6.1	5.51107	0.625972	0.113584	-0.0965462	6.1	7.71401	0.157984	0.0204801	0.264592	6.59	7.0542	0.278953	0.0395442	0.0704405	4.75	5.95854	0.238398	0.0400095	0.254429	2.78	2.90499	0.76001	0.261622	0.04496	2.78	3.41558	0.171373	0.0501738	0.228626	6.57	7.08175	0.577519	0.0815503	0.0778913	18.1	18.7884	4.05908	0.216042	0.0380325	18.1	18.9734
Eu	151	ppm	0.517	0.520473	0.0749584	0.14402	0.00671803	2.07	1.96542	0.235888	0.120019	-0.0505214	2.07	1.49568	0.0117798	0.00787587	-0.277447	1.97	2.29185	0.463632	0.202296	0.163377	1.67	1.92373	0.263683	0.137068	0.151935	0.953	1.01952	0.219864	0.215655	0.0697979	0.953	0.706105	0.0294054	0.0416445	-0.259071	1.21	1.31373	0.185832	0.141454	0.0857313	4.14	4.33949	0.338671	0.0780439	0.0481853	4.14	5.20471
Gd	155	ppm	1.85	1.84367	0.313008	0.169774	-0.0034206	6.16	5.10882	1.02233	0.20011	-0.170647	6.16	5.18772	0.281349	0.0542337	-0.157838	6.71	7.45631	0.97431	0.130669	0.111224	5.26	5.91251	0.722519	0.122202	0.124052	2.59	3.29703	1.20834	0.366492	0.272985	2.59	1.85199	0.167287	0.0903284	-0.284945	5.31	6.11011	0.845832	0.138432	0.150679	11.3	14.823	1.04961	0.0708098	0.311768	11.3	12.2743
Tb	159	ppm	0.35	0.397656	0.026036	0.0654738	0.13616	0.92	0.841232	0.116526	0.138518	-0.085617	0.92	0.865686	0.0599171	0.0692134	-0.0590367	1.02	1.01605	0.124315	0.122351	-0.00386962	0.797	0.943456	0.0542248	0.0574747	0.183759	0.371	0.39374	0.0858206	0.217963	0.0612935	0.371	0.475794	0.0405479	0.0852216	0.282463	0.773	0.737305	0.084847	0.115077	-0.0461774	1.24	1.08876	0.217848	0.200087	-0.121964	1.24	1.60368
Dy	163	ppm	2.55	2.72419	0.274021	0.100588	0.0683103	5.28	4.88485	0.576548	0.118028	-0.0748383	5.28	5.17807	0.11987	0.0231495	-0.0193052	6.44	7.06217	0.895466	0.126798	0.0966098	4.84	5.91455	0.900603	0.152269	0.222015	2.22	2.76443	0.703083	0.254332	0.245237	2.22	2.81972	0.233975	0.0829779	0.270145	4.5	5.04414	0.811632	0.160906	0.12092	5.97	6.24759	1.58327	0.253421	0.0464983	5.97	6.3746
Ho	165	ppm	0.56	0.568677	0.0759274	0.133516	0.0154939	0.98	0.963085	0.0690109	0.0716561	-0.01726	0.98	1.22729	0.101497	0.0827	0.252335	1.27	1.39299	0.143049	0.102692	0.0968412	0.906	1.1055	0.0509473	0.0460851	0.220203	0.42	0.474111	0.0763208	0.160976	0.128837	0.42	0.414517	0.00441909	0.0106608	-0.0130546	0.86	0.982907	0.145535	0.148066	0.142916	0.95	0.832027	0.23566	0.283237	-0.124183	0.95	0.987862
Er	166	ppm	1.7	1.93955	0.287687	0.148327	0.140911	2.56	2.52436	0.191123	0.0757115	-0.0139219	2.56	1.98361	0.234951	0.118446	-0.225151	3.7	4.18506	0.815048	0.194752	0.131096	2.44	3.50956	0.426154	0.121426	0.438346	1.18	1.4938	0.130851	0.0875965	0.26593	1.18	1.14816	0.140485	0.122356	-0.0269799	2.49	2.93234	0.320744	0.109381	0.177648	2.39	2.39917	0.574259	0.239357	0.00383625	2.39	1.87652
Yb	173	ppm	1.64	1.94047	0.311339	0.160445	0.183215	2.01	2.00436	0.308138	0.153734	-0.00280675	2.01	2.56578	0.419945	0.163671	0.276509	3.39	3.51998	0.610445	0.173423	0.0383427	2.06	2.6166	0.374806	0.143242	0.270193	1.13	1.22092	0.19999	0.163803	0.0804595	1.13	0.86899	0.0635999	0.0731883	-0.230983	2.38	2.37979	0.40786	0.171385	-8.98393e-05	1.8	1.8136	0.355539	0.19604	0.00755794	1.8	2.09908
Lu	175	ppm	0.248	0.263222	0.0621821	0.236235	0.0613776	0.279	0.225562	0.0680575	0.301724	-0.191534	0.279	0.290845	0.0128128	0.0440536	0.0424538	0.503	0.556118	0.107651	0.193576	0.105603	0.286	0.370325	0.07056	0.190535	0.294843	0.168	0.205457	0.0524584	0.255326	0.222957	0.168	0.153679	0.000995306	0.00647654	-0.0852464	0.354	0.315683	0.0331971	0.10516	-0.108241	0.25	0.286368	0.0176593	0.0616665	0.145473	0.25	0.359598
Notes: Ref. value, reference value ; Ave. value, average value; RD, relative deviation.
[truncated: 3 more columns]

## Sheet: Table S6
American Mineralogist: October 2023 Online Materials AM-23-108586 (use tabs to navigate to other tables)
He et al.: Crystal vs. melt effects on trace-element partitioning
Table S6. Cpx compositions in terms of molar fractions.
Run #		1H04-1	2H04-2	3H04-3	4H04-4	5H05-1	6H05-2	7H05-3	8H07-1	9H07-2	10H08-1	11H08-2	12H09-1	13H09-2	14H09-3
Starting material		HISILA	HISILB	HISILA4D	HISILA8D	*HISILA	*HISILB	*HISILC	HISILB	HISILC	†HISILA	†HISILB	‡HISILA	‡HISILB	‡HISILC
Cations in clinopyroxene in a 6 oxygen basis
Site	Cation
IV	Si4+	1.91903	1.94739	1.92074	1.92318	1.91361	1.93188	1.93996	1.93341	1.93845	1.90481	1.94253	1.90242	1.93587	1.92825
	Al3+	0.0809682	0.0526083	0.0792638	0.0768169	0.086392	0.068122	0.0600409	0.0665906	0.0615485	0.095189	0.057467	0.0975771	0.0641322	0.0717517
M1	Mg2+	0.879811	0.895491	0.869877	0.874316	0.8547	0.907868	0.895294	0.899844	0.889859	0.861284	0.899717	0.874594	0.890987	0.897645
	Al3+	0.0305437	0.028829	0.0340294	0.0497286	0.0455136	0.011888	0.0177992	0.016976	0.0187475	0.0371461	0.0148311	0.027751	0.0248431	0.0104659
	Ti4+	0.00277581	0.0019638	0.00259532	0.00276106	0.00327493	0.00170556	0.00346285	0.00181665	0.00334135	0.00299817	0.00187789	0.00362071	0.00195267	0.00359665
	Cr3+	0.0089778	0.0062671	0.0151718	0.00603762	0.00746256	0.00339777	0.00391611	0.00488862	0.0115475	0.00667049	0.00828085	0.00797458	0.00515619	0.00854157
	Fe3+	0.065087	0.0572754	0.0677803	0.0609264	0.0762847	0.0652973	0.0640704	0.0665904	0.0599793	0.079113	0.0668156	0.0720951	0.0683627	0.0635011
	Ni2+	0.0128046	0.0101742	0.0105457	0.00623042	0.0127643	0.00984297	0.0154579	0.00988453	0.0165249	0.0127884	0.00847802	0.013965	0.00869876	0.0162499
M2	Ca2+	0.833809	0.902785	0.841025	0.870923	0.82106	0.889436	0.892694	0.888376	0.876658	0.839199	0.885434	0.847946	0.877036	0.894676
	Na+	0.0346921	0.0566688	0.0354013	0.035173	0.0375135	0.0605859	0.0614706	0.0636077	0.0651917	0.0364336	0.0631806	0.0372705	0.0664505	0.0629328
	K+	0.00246757	0	0.00280073	0.00188588	0.00284138	0	0	0	0	0.00245541	0	0.00239251	0	0
	Mg2+	0.12666	0.0393481	0.117704	0.0901501	0.135802	0.0486785	0.0432949	0.0464633	0.0555749	0.118976	0.0499082	0.109575	0.0548488	0.0401664
	Mn2+	0.00237135	0.00119782	0.00306857	0.00186795	0.00278374	0.00129974	0.00254018	0.00155288	0.00257554	0.00293565	0.00147752	0.00281547	0.00166478	0.00222498
	Total	4.0004	4.00034	4	4	4	4.0006	4.0005	4.00059	4.00045	4.00056	4.00053	4.00057	4.00056	4.00058
	Mg#	93.926	94.2269	93.5775	94.0582	92.8491	93.6099	93.61	93.4257	94.0344	92.5321	93.4265	93.1745	93.2594	93.6582
Component in clinopyroxene
	Jd	0.0305437	0.028829	0.0340294	0.035173	0.0375135	0.011888	0.0177992	0.016976	0.0187475	0.0364336	0.0148311	0.027751	0.0248431	0.0104659
	Ae	0.00414844	0.0278398	0.00137191	0	0	0.0486978	0.0436715	0.0466317	0.0464441	0	0.0483495	0.00951956	0.0416073	0.0524669
	Ca-Ti-Tschermak	0	0	0	0.00276106	0.00327493	0	0	0	0	0.000712485	0	0	0	0
	Ca-Tschermak	0	0	0	0.0117945	0.00472516	0	0	0	0	0	0	0	0	0
	Es	0.0609385	0.0294356	0.0664084	0.0609264	0.0762847	0.0165995	0.0203989	0.0199588	0.0135352	0.079113	0.0184661	0.0625756	0.0267553	0.0110341
	Di	0.772871	0.87335	0.774617	0.795441	0.736775	0.872836	0.872295	0.868417	0.863123	0.759374	0.866968	0.78537	0.850281	0.883642
	En	0.106941	0.0221408	0.0952607	0.0788749	0.117925	0.035032	0.0229982	0.0314264	0.0267367	0.10191	0.0327489	0.0892232	0.040706	0.0140033
	Total	0.975442	0.981595	0.971687	0.984971	0.976498	0.985054	0.977163	0.98341	0.968586	0.977543	0.981363	0.97444	0.984192	0.971612
Component in cpx was calculated following the method described by Morimoto et al. (1988). Jd = Jadeite (NaAlSi2O6); Ae = Aegirine (NaFe3+Si2O6); Ca-Ti-Tschermak = CaTiAl2O6; Ca-Tschermak = CaAl2SiO6; Es = Esseneite (CaFe3+AlSiO6); Di = Diopside (CaMgSi2O6); En = Enstatite (Mg2Si2O6).

## Sheet: Table S7
American Mineralogist: October 2023 Online Materials AM-23-108586 (use tabs to navigate to other tables)
He et al.: Crystal vs. melt effects on trace-element partitioning
Table S7. Trace element (ppm) compositions of glasses, as measured by LA-ICP-MS under single-spot (30 mm) analytical mode.
Run #	1H04-1	2H04-2	3H04-3	4H04-4	5H05-1	6H05-2	7H05-3	8H07-1	9H07-2	10H08-1	11H08-2	12H09-1	13H09-2	14H09-3
Starting material	HISILA	HISILB	HISILA4D	HISILA8D	*HISILA	*HISILB	*HISILC	HISILB	HISILC	†HISILA	†HISILB	‡HISILA	‡HISILB	‡HISILC
n	12	10	10	13	10	10	11	11	15	13	13	10	12	10
Ni (ppm)	247(41)	116(27)	102(24)	53(7)	170(11)	177(35)	326(35)	130(14)	282(36)	125(22)	67(5)	177(32)	95(20)	184(31)
Sc	411(12)	266(23)	327(48)	205(11)	427(11)	305(25)	518(11)	288(14)	511(22)	317(46)	197(23)	375(37)	293(24)	403(20)
V	407(7)	327(8)	418(8)	427(6)	415(6)	309(9)	488(13)	322(5)	507(10)	416(6)	333(8)	423(11)	327(8)	509(11)
Co	362(16)	238(25)	313(46)	222(16)	368(11)	280(17)	474(13)	239(19)	447(31)	308(27)	221(21)	339(43)	239(39)	372(13)
Cu	46(2)	43(4)	53(5)	44(3)	54(3)	45(2)	130(5)	49(6)	171(7)	53(3)	41(3)	55(3)	41(4)	121(6)
Zn	378(19)	276(24)	365(30)	339(14)	411(10)	266(18)	490(25)	264(18)	510(37)	365(37)	261(22)	368(39)	285(32)	447(21)
Nb	376(7)	633(19)	377(8)	390(9)	373(4)	597(18)	344(8)	604(7)	362(8)	377(6)	632(12)	373(8)	615(16)	356(7)
Ta	230(3)	329(7)	247(6)	251(4)	242(3)	328(11)	194(3)	332(6)	194(4)	247(5)	348(11)	231(6)	337(9)	201(9)
Zr	357(8)	558(12)	377(9)	383(7)	373(5)	523(11)	320(8)	556(7)	339(7)	370(7)	578(10)	365(8)	569(8)	344(7)
Hf	287(5)	507(11)	297(6)	295(6)	294(5)	490(9)	298(7)	492(9)	314(5)	298(5)	518(14)	280(8)	505(11)	315(11)
Rb	306(9)	304(16)	320(12)	333(5)	310(7)	277(10)	169(7)	302(8)	177(7)	317(8)	314(9)	315(10)	307(17)	187(9)
Sr	398(14)	327(21)	404(26)	409(6)	436(19)	366(16)	256(9)	340(10)	235(15)	427(20)	364(19)	417(16)	365(37)	225(9)
La	303(19)	273(15)	311(22)	302(13)	316(16)	264(10)	211(10)	269(14)	219(10)	317(19)	267(14)	301(14)	275(27)	204(16)
Ce	334(20)	330(19)	342(23)	326(14)	350(17)	307(14)	258(11)	325(16)	270(11)	348(21)	316(17)	331(14)	328(30)	254(19)
Nd	284(14)	269(12)	275(20)	249(12)	293(15)	262(16)	223(8)	264(15)	233(10)	290(20)	257(14)	280(18)	279(27)	215(18)
Sm	306(15)	300(15)	289(24)	252(12)	313(17)	309(20)	250(10)	299(20)	250(9)	306(25)	282(16)	298(19)	304(33)	222(16)
Eu	200(12)	199(13)	181(20)	152(10)	201(12)	192(11)	158(6)	183(15)	159(9)	194(20)	172(11)	188(16)	189(24)	137(13)
Gd	217(9)	191(11)	214(20)	181(9)	237(13)	207(11)	159(7)	195(12)	151(5)	224(17)	184(12)	219(14)	200(21)	139(10)
Tb	220(10)	205(10)	194(19)	165(9)	214(12)	192(11)	150(5)	193(12)	164(6)	203(16)	176(12)	206(6)	192(20)	135(11)
Dy	223(11)	197(9)	211(20)	179(10)	230(13)	209(9)	169(6)	197(12)	163(6)	220(17)	182(12)	224(6)	195(19)	143(11)
Ho	205(9)	206(9)	191(17)	163(9)	209(11)	204(9)	151(5)	201(11)	158(5)	206(17)	192(13)	206(7)	208(19)	142(11)
Er	232(10)	220(10)	215(19)	185(10)	231(12)	206(11)	154(5)	216(13)	167(6)	213(16)	189(11)	212(7)	201(17)	138(10)
Yb	116(5)	119(5)	111(8)	99(5)	120(7)	119(4)	121(5)	116(6)	124(6)	110(7)	107(7)	109(5)	113(8)	108(7)
Lu	120(5)	102(4)	114(9)	102(5)	122(7)	105(6)	115(4)	105(5)	114(6)	120(7)	95(6)	117(4)	101(7)	106(8)

## Sheet: Table S8
American Mineralogist: October 2023 Online Materials AM-23-108586 (use tabs to navigate to other tables)
He et al.: Crystal vs. melt effects on trace-element partitioning
Table S8. Selected major (wt% oxides) and trace (ppm) element compositions of cpx, as measured by LA-ICP-MS under different analytical modes.
Run #	1H04-1	2H04-2	3H04-3	4H04-4	5H05-1	6H05-2	7H05-3	8H07-1	9H07-2	10H08-1	11H08-2	12H09-1	13H09-2	14H09-3
Starting material	HISILA	HISILB	HISILA4D	HISILA8D	*HISILA	*HISILB	*HISILC	HISILB	HISILC	†HISILA	†HISILB	‡HISILA	‡HISILB	‡HISILC
LA-ICP-MS mode	Single-spot	Single-spot	Single-spot	Single-spot	Single-spot	Single-spot	Single-spot	Line scanning	Single-spot	Single-spot	Single-spot	Line scanning	Line scanning	Line scanning
Spot size	12 mm	12 mm	15 mm	12 mm	10 mm	12 mm	12 mm	10 mm	10 mm	10 mm	10 mm	10 mm	10 mm	10 mm
n.	3	12	4	10	10	15	5	7	4	8	5	4	8	4
FeOt (wt%)	2.02(6)	2.21(29)	2.41(28)	2.27(20)	3.10(20)	2.03(32)	1.85(8)	2.21(21)	1.68(30)	2.32(38)	2.07(36)	2.41(22)	2.16(17)	2.17(43)
TiO2 (wt%)	0.12(3)	0.09(1)	0.09(2)	0.11(2)	0.14(3)	0.06(1)	0.14(2)	0.07(4)	0.15(2)	0.13(2)	0.07(1)	0.12(3)	0.07(1)	0.14(3)
Cr (ppm)	2718(686)				2123(301)	933(341)		1935(513)	2978(527)	2062(408)		2001(250)	1648(503)	2022(142)
Mn	956(148)	535(59)	825(42)	721(140)	1136(86)	525(71)	950(74)	576(102)	872(55)	1232(117)	708(132)	990(97)	618(62)	1014(138)
Ni	3557(487)	2364(243)	1856(358)	1622(158)	3587(450)	2563(300)	4098(837)	2399(88)	4332(338)	3300(558)	2704(404)	3496(335)	2529(240)	4741(634)
Sc	1639(181)	1090(90)		1058(164)	1868(179)	1106(109)	1897(212)	1601(215)	2077(201)	1680(293)	1251(179)	1840(326)	1406(192)	2151(147)
V	56(10)		45(1)			27(7)	58(18)	26(7)		42(14)	31(9)		22(4)	33(6)
Co	1178(161)	786(70)	944(84)	988(173)	1287(108)	772(113)	1464(97)	946(114)	1372(71)	1274(184)	1004(171)	1225(60)	898(99)	1454(100)
Cu			7(4)		18(6)	10(4)	20(1)		28(15)	19(3)		18(1)	8(3)	12(3)
Zn	393(37)		257(24）		388(35)	170(16)	294(18)	203(21)	307(11)	301(20)	206(27)	361(56)	243(29)	319(98)
Nb			10(3)		17(6)	17(8)	10(9)	10(4)	9(4)	17(8)	14(7)	11(2)	10(1)	4(1)
Ta			14(8)		19(5)	16(5)	8(4)	11(5)	13(2)	19(7)	16(6)	18(5)	12(3)	5(2)
Zr	111(15)		68(30)		113(26)	108(21)	58(14)	115(20)	86(8)	115(18)	117(13)	115(18)	144(22)	97(18)
Hf	125(9)		99(8)		160(21)	179(31)	102(16)	175(56)	153(21)	157(34)	193(18)	175(15)	257(34)	167(30)
Rb	10(5)	30(8)	7(4)	41(13)	10(3)	8(4)	6(5)	3(3)	3(3)	11(7)	5(2)	6(1)	2(2)	2(1)
Sr	65(5)		78(12)		87(20)	97(16)	68(8)	85(25)	63(5)	76(10)	120(9)	73(17)	107(12)	69(11)
La	77(13)		111(18)		93(10)	91(16)	85(17)	89(16)	87(11)	96(11)	103(13)	103(16)	107(21)	80(3)
Ce	126(1)		190(41)		172(21)	153(14)	132(13)	140(7)	134(4)	159(9)	180(32)	188(24)	173(33)	126(21)
Nd	249(15)	316(31)	257(27)	255(23)	336(17)	280(37)	210(22)	302(36)	260(22)	276(43)	317(21)	362(49)	343(38)	259(9)
Sm	518(30)		445(63)	416(48)	637(38)	405(37)	342(34)	576(70)	467(23)	595(40)	583(92)	595(40)	591(32)	446(35)
Eu	354(2)		311(45)	276(39)	432(27)	305(26)	244(17)	350(42)	275(21)	378(46)	382(78)	409(12)	402(37)	309(18)
Gd	373(31)	312(37)		309(19)	445(47)	309(40)	225(28)	405(18)	241(30)		376(15)	439(69)	408(43)	339(14)
Tb	371(93)	317(34)		279(28)	447(22)	296(33)	245(26)	394(40)	291(16)	395(58)	374(27)	452(27)	407(31)	344(34)
Dy			369(50)	314(42)	569(40)	310(39)	242(25)	411(49)	317(17)	430(49)	402(26)	498(42)	428(43)	307(22)
Ho	389(1)	346(35)	306(41)	287(39)	473(24)	303(24)	230(24)	410(19)	277(16)	391(46)	396(18)	460(38)	396(35)	317(28)
Er	445(81)	369(33)	304(13)	336(43)	553(27)	323(28)	257(33)	457(56)	274(7)	430(51)	380(14)	510(10)	397(35)	273(13)
Yb	194(1)	180(13)	146(15)	149(23)	257(29)	155(24)	154(31)	192(28)	195(19)	212(38)	207(1)	249(11)	207(28)	181(32)
Lu	198(17)	150(16)	164(14)	155(22)	253(7)	125(21)	124(15)	148(22)	176(16)	186(20)	147(3)	217(17)	156(12)	175(21)

## Sheet: Table S9
American Mineralogist: October 2023 Online Materials AM-23-108586 (use tabs to navigate to other tables)
He et al.: Crystal vs. melt effects on trace-element partitioning
Table S9. Major element (wt%) composition of coexisting cpx (along the A-B transect in Figure 1) and galss (random spot analysis) from run 9H07-2, as measured by EPMA.
mm	Run #	SiO2	Al2O3	FeO	MgO	CaO	Na2O	K2O	TiO2	Cr2O3	MnO	NiO	Total
Distance along A-B transect of cpx
4	9H07-2	53.229	1.955	1.948	17.442	22.953	0.905	0.027	0.144	0.38	0.077	0.598	99.658
8	9H07-2	53.898	1.753	1.882	17.568	22.662	0.882	0	0.115	0.405	0.066	0.543	99.774
12	9H07-2	53.129	1.817	1.952	17.402	22.35	0.968	0.02	0.124	0.459	0.09	0.556	98.867
16	9H07-2	53.743	1.873	1.97	17.495	22.554	0.918	0.001	0.132	0.39	0.094	0.554	99.724
20	9H07-2	53.354	1.899	2.019	17.518	22.157	0.96	0	0.139	0.416	0.081	0.559	99.102
24	9H07-2	53.604	1.843	1.939	17.283	22.374	0.949	0	0.151	0.417	0.1	0.568	99.228
Random spot in glass
n.	Run #	SiO2	Al2O3	FeO	MgO	CaO	Na2O	K2O	TiO2	Cr2O3	MnO	NiO	Total
1	9H07-2	68.01	14.41	1.865	2.27	2.857	8.874	0.081	0.199	0.047	0.057	0.036	98.706
2	9H07-2	68.166	14.718	1.887	2.21	2.754	9.113	0.085	0.203	0.042	0.048	0.031	99.257
3	9H07-2	68.715	14.921	1.898	2.368	2.597	9.01	0.087	0.193	0.031	0.043	0.026	99.889
4	9H07-2	67.891	14.136	1.909	2.491	2.632	8.81	0.079	0.194	0.065	0.063	0.041	98.311
5	9H07-2	68.052	14.258	1.85	2.193	2.79	9.132	0.078	0.202	0.059	0.055	0.039	99.572
6	9H07-2	68.031	14.48	1.876	2.491	2.937	8.944	0.091	0.208	0.042	0.051	0.04	99.853
7	9H07-2	67.62	14.106	1.837	2.319	2.869	8.958	0.057	0.216	0.065	0.06	0.038	99.866
8	9H07-2	68.43	14.135	1.873	2.277	2.803	9.025	0.061	0.185	0.046	0.048	0.028	99.757
9	9H07-2	68.472	14.68	1.869	2.416	2.791	9.046	0.085	0.179	0.041	0.049	0.031	99.467
10	9H07-2	68.3	14.328	1.923	2.245	2.667	8.811	0.071	0.2	0.048	0.056	0.037	98.274

## Sheet: Table S10
American Mineralogist: October 2023 Online Materials AM-23-108586 (use tabs to navigate to other tables)
He et al.: Crystal vs. melt effects on trace-element partitioning
Table S10. Best fits for lattice strain parameters for individual experiments.
Run #	Starting material	experimental conditions	M1 (+2) [Mg/Co/Ni/Zn]									M1 (+3) [Al/Cr/Sc]									M1 (+4) [Ti/Hf/Zr]									M1 (+5) [V/Nb/Ta]									M2 (+2) [Mn/Ca/Sr]									M2 (+3) [REE]
			Na	r0 (Å)	SE	EM (Gpa)	SE	D0	SE	c2	R2	N	r0 (Å)	SE	EM (Gpa)	SE	D0	SE	c2	R2	N	r0 (Å)	SE	EM(Gpa)	SE	D0	SE	c2	R2	N	r0 (Å)	SE	EM (Gpa)	SE	D0	SE	c2	R2	N	r0 (Å)	SE	EM (Gpa)	SE	D0	SE	c2	R2	N	r0 (Å)
1H04-1	HISILA	1atm, 1100 ℃	4	0.69043	0.00125	4599	394	16.3751	1.91287	1.72278	0.99235	3	0.676	fixed	1649	34	27.19	2.74	0.52736	0.9949	3	0.652	fixed	1146.66	28.2812	1.0794	0.02354	0.01149	0.99937										3	1.071	fixed	272.139	2.82435	8.45919	0.23563	0.09565	0.99936	11	1.02722
2H04-2	HISILB	1atm, 1100 ℃	3	0.69	fixedb	5491.47	51.8056	23.947	0.3448	0.0049	0.9998																																					7	1.0259
3H04-3	HISILA4D	1atm, 1100 ℃	4	0.69037	5.5931e-05	6253.7	29.819	28.3217	0.2974	0.00409	0.99994										3	0.65	fixed	1430.76	94.0709	1.06815	0.05606	0.17292	0.9966	3	0.58	fixed	3064	692.398	0.26575	0.05561	0.90476	0.98723	3	1.077	fixed	289.956	3.57592	10.0937	0.24968	0.05396	0.99951	10	1.03319
4H04-4	HISILA8D	1atm, 1100 ℃	3	0.69	fixed	5206.96	805.737	34.9724	6.2383	2.01184	0.97042																																					10	1.02904
5H05-1	*HISILA	1atm, 1100 ℃	4	0.6898	0.000134406	5083.36	49.7287	20.4727	0.31555	0.04816	0.99983	3	0.676	fixed	1554.37	68.3852	27.8558	6.15833	3.45727	0.9753	3	0.655	fixed	1893.45	132.632	1.97921	0.17987	0.05298	0.99585										3	1.072	fixed	268.228	1.15909	9.39244	0.04179	0.00478	0.99999	12	1.02121
6H05-2	*HISILB	1atm, 1100 ℃	4	0.69061	0.0025	5578.48	900.567	18.7792	4.44952	7.53397	0.96724	3	0.679	fixed	1760.97	18.2086	22.1695	1.40292	0.16278	0.9978	3	0.653	fixed	1768.89	86.9642	1.31956	0.08529	0.03925	0.99742	3	0.586	fixed	4108.74	1716.48	0.43232	0.37001	0.93052	0.82131	3	1.084	fixed	283.425	2.66949	8.67038	0.12268	0.02921	0.99983	12	1.03539
7H05-3	*HISILC	1atm, 1100 ℃	4	0.69002	0.00232	5563.07	962.959	20.2131	5.17544	33.1749	0.98146										3	0.65	fixed	1692.31	121.056	1.30944	0.10566	0.1426	0.99535	3	0.583	fixed	3784.62	633.428	0.4332	0.12482	0.1263	0.97208	3	1.083	fixed	278.222	1.04703	8.46769	0.04474	0.00864	0.99998	12	1.0379
8H07-1	HISILB	1atm, 1090 ℃	4	0.69032	0.00296	5627.39	1062.31	26.1614	6.76717	12.5462	0.96367	3	0.682	fixed	1642.48	12.5455	27.2463	1.26985	0.07319	0.99872	3	0.652	fixed	1699.59	47.0161	1.29632	0.05505	0.00839	0.99875	3	0.582	fixed	3810.04	1187.54	0.2818	0.17478	1.07603	0.86255	3	1.082	fixed	298.083	0.90836	11.1247	0.0356	0.00155	0.99999	12	1.0351
9H07-2	HISILC	1atm, 1090 ℃	4	0.68957	0.0018	5623.84	790.655	20.667	5.3736	11.9079	0.96628	3	0.676	fixed	1812.15	14.2057	33.1631	1.5471	0.1271	0.99889	3	0.656	fixed	2199.73	99.8045	2.09012	0.17568	0.05307	0.99704										3	1.085	fixed	286.658	1.57415	9.04596	0.10663	0.01944	0.99989	12	1.03732
10H08-1	†HISILA	1atm, 1080 ℃	4	0.68938	0.000409564	5697.23	166.27	29.3095	1.50057	0.20198	0.99868	3	0.673	fixed	1820.23	6.09834	53.6432	1.14665	0.00616	0.99977	3	0.655	fixed	1764.21	23.2342	1.79647	0.02869	0.00347	0.99985	3	0.585	fixed	2308.69	1542.18	0.24052	0.19417	0.74216	0.6606	3	1.068	fixed	279.677	1.06914	11.2241	0.07012	0.00968	0.99997	11	1.03161
11H08-2	†HISILB	1atm, 1080 ℃	4	0.68976	0.00202	6106.28	753.159	36.6671	6.67053	3.53479	0.97502										3	0.653	fixed	1925.03	105.774	1.55986	0.14086	0.09615	0.99622	3	0.582	fixed	3094.1	1316.67	0.25716	0.17737	1.27772	0.7995	3	1.083	fixed	300.423	0.02381	14.7335	0.00254	6.18601e-06	1	12	1.03317
12H09-1	‡HISILA	1atm, 1070 ℃	4	0.68965	0.000144971	4950.19	70.8766	20.8318	0.40538	0.03204	0.99992	3	0.674	fixed	1843.64	21.3691	49.0058	3.80706	0.0944	0.997	3	0.656	fixed	2289.85	123.13	2.94251	0.25582	0.0653	0.99763										3	1.073	fixed	283.422	1.24337	9.72872	0.05914	0.00431	0.99997	12	1.02278
13H09-2	‡HISILB	1atm, 1070 ℃	4	0.68977	0.000541762	5517.82	235.881	26.3911	2.1404	0.20932	0.99627	3	0.676	fixed	1747.26	3.58498	36.5284	0.46742	0.0039	0.99992	3	0.657	fixed	2471.69	22.2858	2.58909	0.044	0.00128	0.99991	3	0.583	fixed	4028.18	1443.95	0.27268	0.23128	4.20358	0.77729	3	1.086	fixed	304.374	3.98414	12.6637	0.33288	0.06726	0.99943	12	1.036
14H09-3	‡HISILC	1atm, 1070 ℃	4	0.68966	0.00113	5493.49	614.665	27.0609	5.41317	2.29834	0.98355	3	0.676	fixed	2099.95	4.21343	61.8211	0.87647	0.01456	0.9999	3	0.656	fixed	2057.27	107.96	2.09332	0.16011	0.03853	0.99751	3	0.582	fixed	4326.53	973.772	0.26821	0.13531	1.5577	0.91824	3	1.081	fixed	279.989	2.2474	11.6268	0.18865	0.01708	0.99981	12	1.03825
a N means the number of measured D for isovalent elements entering the same site, which were used to constrain the lattice strain parameters in regression analysis.
b The standard error cannot be obtained when there are only three partition coeﬃcients available, in which case r0 was fixed and only the D0 and E parameters were fitted.
[truncated: 7 more columns]
